# Supplementary material for: Very Preterm Early Motor Repertoire and Neurodevelopmental Outcomes at 8 Years
Source: Oxford University Press journal article supplement (doi:10.1542/peds.2020-049572), 2021-08-27
Supplement: peds_2020049572supplementarydata.pdf [file peds_2020049572supplementarydata.pdf]

Supplemental Information

**SUPPLEMENTAL TABLE 4** Univariable Associations Between the Early Motor Repertoire and Neurodevelopmental Outcome Presenting Unstandardized Coefficients B (Represents Change in Dependent Variable per Unit Change in Independent Variable) (95% CI) and R<sup>2</sup> for Analyses, Excluding Children With CP: General Cognition

| Early Motor Repertoire                                  | Verbal Reasoning Composite SS, n = 70               | Nonverbal Reasoning Composite SS, n = 71             | Spatial Reasoning Composite SS, n = 71             | General Conceptual Ability SS, n = 70              |
|---------------------------------------------------------|-----------------------------------------------------|------------------------------------------------------|----------------------------------------------------|----------------------------------------------------|
| FMs: absent or normal                                   | 17.7 (7.72–27.7); P = .001; R <sup>2</sup> = 0.155  | 14.0 (3.55–24.5); P = .009; R <sup>2</sup> = 0.094   | 20.7 (8.54–32.8); P = .001; R <sup>2</sup> = 0.144 | 19.3 (8.25–30.3); P = .001; R <sup>2</sup> = 0.152 |
| Observed movement patterns: N<A or N=A, N>A             | 10.7 (1.72–19.7); P = .020; R <sup>2</sup> = 0.077  | 11.8 (1.89–21.6); P = .020; R <sup>2</sup> = 0.076   | 19.8 (8.48–31.0); P = .001; R <sup>2</sup> = 0.151 | 16.4 (6.95–25.9); P = .001; R <sup>2</sup> = 0.150 |
| Age-adequacy: absent, reduced, or present               | 5.37 (2.04–8.70); P = .002; R <sup>2</sup> = 0.132  | 5.55 (1.89–9.20); P = .003; R <sup>2</sup> = 0.117   | 9.16 (5.09–13.2); P < .001; R <sup>2</sup> = 0.226 | 7.57 (4.09–11.1); P < .001; R <sup>2</sup> = 0.217 |
| Observed postural patterns: N<A or N=A, N>A             | 4.32 (-2.81–11.5); P = 0.23; R <sup>2</sup> = 0.021 | 7.08 (-0.65–14.8); P = 0.072; R <sup>2</sup> = 0.046 | 11.5 (2.49–20.5); P = .013; R <sup>2</sup> = 0.086 | 8.93 (1.30–16.6); P = .023; R <sup>2</sup> = 0.074 |
| Movement character: abnormal, not CS, smooth and fluent | 10.8 (5.16–16.4); P < .001; R <sup>2</sup> = 0.177  | 11.6 (5.50–17.7); P < .001; R <sup>2</sup> = 0.173   | 16.8 (9.86–23.7); P < .001; R <sup>2</sup> = 0.254 | 14.9 (9.12–20.7); P < .001; R <sup>2</sup> = 0.279 |
| MOS                                                     | 1.42 (0.86–1.99); P < .001; R <sup>2</sup> = 0.270  | 1.33 (0.72–1.94); P < .001; R <sup>2</sup> = 0.216   | 2.03 (1.38–2.69); P < .001; R <sup>2</sup> = 0.356 | 1.84 (1.27–2.42); P < .001; R <sup>2</sup> = 0.375 |

CS, cramped-synchronized; MOS, motor optimality score; N<A, lower number of normal than abnormal; N=A, same number of normal and abnormal; N>A, higher number of normal than abnormal; SS, scaled score.

**SUPPLEMENTAL TABLE 5** Univariable Associations Between the Early Motor Repertoire and Neurodevelopmental Outcome Presenting Unstandardized Coefficients B (Represents Change in Dependent Variable per Unit Change in Independent Variable) (95% CI) and  $R^2$  for Analyses, Excluding Children With CP: Attention

| Early Motor Repertoire                                  | Sustained Attention, $n = 74$                   | Selective Attention, $n = 74$                  |
|---------------------------------------------------------|-------------------------------------------------|------------------------------------------------|
| FMs: absent or normal                                   | 3.76 (0.77–6.74); $P = .014$ ; $R^2 = 0.080$    | –0.46 (–3.61–2.70); $P = 0.77$ ; $R^2 = 0.001$ |
| Observed movement patterns: N<A or N=A, N>A             | 4.57 (1.86–7.27); $P = .001$ ; $R^2 = 0.137$    | 5.93 (3.34–8.52); $P < .001$ ; $R^2 = 0.224$   |
| Age-adequacy: absent, reduced, present                  | 0.66 (–0.41–1.73); $P = 0.22$ ; $R^2 = 0.021$   | 1.26 (0.21–2.31); $P = .020$ ; $R^2 = 0.073$   |
| Observed postural patterns: N<A or N=A, N>A             | –0.27 (–2.44–1.90); $P = 0.81$ ; $R^2 = 0.001$  | 2.21 (0.079–4.35); $P = .042$ ; $R^2 = 0.056$  |
| Movement character: abnormal, not CS, smooth and fluent | 1.76 (–0.051–3.58); $P = 0.057$ ; $R^2 = 0.050$ | 2.38 (0.58–4.18); $P = .010$ ; $R^2 = 0.088$   |
| MOS                                                     | 0.27 (0.086–0.45); $P = .005$ ; $R^2 = 0.106$   | 0.19 (0.00–0.38); $P = .050$ ; $R^2 = 0.052$   |

CS, cramped-synchronized; MOS, motor optimality score; N<A, lower number of normal than abnormal; N=A, same number of normal and abnormal; N>A, higher number of normal than abnormal; SS, scaled score.

**SUPPLEMENTAL TABLE 6** Univariable Associations Between the Early Motor Repertoire and Neurodevelopmental Outcome Presenting Unstandardized Coefficients B (Represents Change in Dependent Variable per Unit Change in Independent Variable) (95% CI) and  $R^2$  for Analyses, Excluding Children With CP: Working Memory

| Early Motor Repertoire                                  | Immediate Verbal Memory, $n = 73$             | Verbal Working Memory, $n = 71$                |
|---------------------------------------------------------|-----------------------------------------------|------------------------------------------------|
| FMs: absent or normal                                   | 19.0 (2.13–35.9); $P = .028$ ; $R^2 = 0.066$  | 12.4 (–1.32–26.2); $P = 0.076$ ; $R^2 = 0.045$ |
| Observed movement patterns: N<A or N=A, N>A             | 29.5 (13.5–45.5); $P < .001$ ; $R^2 = 0.160$  | 13.3 (–1.67–28.2); $P = 0.081$ ; $R^2 = 0.044$ |
| Age-adequacy: absent, reduced, or present               | 10.5 (4.94–16.1); $P < .001$ ; $R^2 = 0.166$  | 8.26 (3.70–12.8); $P = .001$ ; $R^2 = 0.159$   |
| Observed postural patterns: N<A or N=A, N>A             | 3.80 (–8.36–16.0); $P = 0.54$ ; $R^2 = 0.005$ | 1.99 (–8.12–12.1); $P = 0.70$ ; $R^2 = 0.002$  |
| Movement character: abnormal, not CS, smooth and fluent | 13.4 (3.27–23.5); $P = .010$ ; $R^2 = 0.089$  | 9.68 (1.29–18.1); $P = .024$ ; $R^2 = 0.071$   |
| MOS                                                     | 1.94 (0.95–2.93); $P < .001$ ; $R^2 = 0.177$  | 1.26 (0.43–2.08); $P = .003$ ; $R^2 = 0.117$   |

CS, cramped-synchronized; MOS, motor optimality score; N<A, lower number of normal than abnormal; N=A, same number of normal and abnormal; N>A, higher number of normal than abnormal; SS, scaled score.

**SUPPLEMENTAL TABLE 7** Univariable Associations Between the Early Motor Repertoire and Neurodevelopmental Outcome Presenting Unstandardized Coefficients B (Represents Change in Dependent Variable per Unit Change in Independent Variable) (95% CI) and  $R^2$  for Analyses, Excluding Children With CP: Executive Function

| $n = 70$                                                | Spatial Planning and Behavioral Inhibition      |
|---------------------------------------------------------|-------------------------------------------------|
| FMs: absent, normal                                     | 0.28 (–1.08–1.64); $P = 0.68$ ; $R^2 = 0.003$   |
| Observed movement patterns: N<A or N=A, N>A             | 1.67 (0.37–2.97); $P = .013$ ; $R^2 = 0.088$    |
| Age-adequacy: absent, reduced, or present               | 0.30 (–0.19–0.78); $P = 0.23$ ; $R^2 = 0.022$   |
| Observed postural patterns: N<A or N=A, N>A             | 0.052 (–0.90–1.01); $P = 0.91$ ; $R^2 = 0.000$  |
| Movement character: abnormal, not CS, smooth and fluent | 0.89 (0.081–1.69); $P = .031$ ; $R^2 = 0.066$   |
| MOS                                                     | 0.058 (–0.027–0.14); $P = 0.18$ ; $R^2 = 0.027$ |

CS, cramped-synchronized; MOS, motor optimality score; N<A, lower number of normal than abnormal; N=A, same number of normal and abnormal; N>A, higher number of normal than abnormal; SS, scaled score.

**SUPPLEMENTAL TABLE 8** Univariable Associations Between the Early Motor Repertoire and Neurodevelopmental Outcome Presenting Unstandardized Coefficients B (Represents Change in Dependent Variable per Unit Change in Independent Variable) (95% CI) and  $R^2$  for Analyses, Excluding Children With CP: Motor

|                                                               | Manual Dexterity Component SS,<br><i>n</i> = 72  | Aiming and Catching Component SS,<br><i>n</i> = 73 | Balance Component SS, <i>n</i> = 71               | Total Test SS, <i>n</i> = 71                        |
|---------------------------------------------------------------|--------------------------------------------------|----------------------------------------------------|---------------------------------------------------|-----------------------------------------------------|
| FMs: absent, normal                                           | 4.53 (1.51–7.55); <i>P</i> = .004; $R^2$ = 0.113 | 3.29 (0.80–5.78); <i>P</i> = .010; $R^2$ = 0.089   | 3.70 (0.38–7.02); <i>P</i> = .030; $R^2$ = 0.067  | 4.99 (1.77–8.21); <i>P</i> = .003; $R^2$ = 0.122    |
| Observed movement patterns:<br>N<A or N=A, N>A                | 3.65 (0.79–6.52); <i>P</i> = .013; $R^2$ = 0.084 | 1.21 (-1.21–3.63); <i>P</i> = 0.32; $R^2$ = 0.014  | 1.93 (-1.19–5.06); <i>P</i> = 0.22; $R^2$ = 0.022 | 2.99 (-0.085–6.07); <i>P</i> = 0.056; $R^2$ = 0.052 |
| Age-adequacy: absent,<br>reduced, present                     | 2.35 (1.38–3.33); <i>P</i> < .001; $R^2$ = 0.249 | 1.11 (0.24–1.97); <i>P</i> = .013; $R^2$ = 0.084   | 2.18 (1.19–3.17); <i>P</i> < .001; $R^2$ = 0.218  | 2.51 (1.57–3.46); <i>P</i> < .001; $R^2$ = 0.291    |
| Observed postural patterns:<br>N<A or N=A, N>A                | 2.35 (0.11–4.58); <i>P</i> = .040; $R^2$ = 0.059 | 0.38 (-1.44–2.20); <i>P</i> = 0.68; $R^2$ = 0.002  | 0.73 (-1.61–3.07); <i>P</i> = 0.54; $R^2$ = 0.006 | 1.59 (-0.72–3.91); <i>P</i> = 0.17; $R^2$ = 0.027   |
| Movement character:<br>abnormal, not CS, smooth<br>and fluent | 4.02 (2.29–5.75); <i>P</i> < .001; $R^2$ = 0.234 | 2.47 (1.00–3.94); <i>P</i> = .001; $R^2$ = 0.136   | 3.76 (1.99–5.53); <i>P</i> < .001; $R^2$ = 0.207  | 4.50 (2.83–6.16); <i>P</i> < .001; $R^2$ = 0.296    |
| MOS                                                           | 0.46 (0.30–0.63); <i>P</i> < .001; $R^2$ = 0.305 | 0.26 (0.11–0.41); <i>P</i> = .001; $R^2$ = 0.148   | 0.42 (0.22–0.61); <i>P</i> < .001; $R^2$ = 0.207  | 0.54 (0.47–0.72); <i>P</i> < .001; $R^2$ = 0.352    |

CS, cramped-synchronized; MOS, motor optimality score; N<A, lower number of normal than abnormal; N=A, same number of normal and abnormal; N>A, higher number of normal than abnormal; SS, scaled score.
